# Supplementary figures and images for: In Vitro Characterization of the Anti-PD-1 Antibody Nivolumab, BMS-936558, and In Vivo Toxicology in Non-Human Primates
Source: Oxford University Press journal article supplement (doi:10.1158/2326-6066.cir-14-0040), 2014-05-28

FigureS3

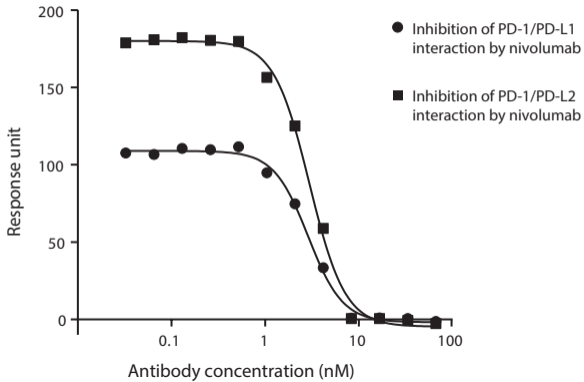

Supplement: 23266066cir140040-sup-fig3.pdf [file 23266066cir140040-sup-fig3.pdf]
